# Supplementary material for: Preferences for Updates on General Research Results: A Survey of Participants in Genomic Research from Two Institutions
Source: MDPI journal article supplement (doi:10.3390/jpm11050399), 2021-05-11
Supplement: s1 [file s1]

## Supplemental Materials

| Demographic characteristics |                                 | Total (N=397) | Columbia University (N=84) | Johns Hopkins University (N=313) | P value |
|-----------------------------|---------------------------------|---------------|----------------------------|----------------------------------|---------|
| Gender                      | Male                            | 120 (30.2%)   | 34 (40.5%)                 | 86 (27.5%)                       | 0.03    |
|                             | Female                          | 268 (67.5%)   | 48 (57.1%)                 | 220 (70.3%)                      |         |
|                             | Prefer not to say               | 9 (2.3%)      | 2 (2.4%)                   | 7 (2.2%)                         |         |
| Age                         | 18-44                           | 99 (24.9%)    | 10 (11.9%)                 | 89 (28.4%)                       | <0.001  |
|                             | 45-59                           | 136 (34.3%)   | 22 (26.2%)                 | 114 (36.4%)                      |         |
|                             | 60+                             | 154 (38.8%)   | 51 (60.7%)                 | 103 (32.9%)                      |         |
|                             | Prefer not to say               | 8 (2.0%)      | 1 (1.2%)                   | 7 (2.2%)                         |         |
| Education                   | Bachelor's degree or less       | 215 (54.2%)   | 42 (50.0%)                 | 173 (55.3%)                      | 0.45    |
|                             | Graduate or professional degree | 174 (43.8%)   | 41 (48.8%)                 | 133 (42.5%)                      |         |
|                             | Prefer not to say               | 8 (2.0%)      | 1 (1.2%)                   | 7 (2.2%)                         |         |
| Race                        | White                           | 343 (86.4%)   | 73 (86.9%)                 | 270 (86.3%)                      | 1.00    |
